# Supplementary material
Source: PubMed Central journal article supplement (PMC5714260)
Supplement: NIHMS74617-supplement-Supplementary_Tables_1__3-7.pdf [file NIHMS74617-supplement-Supplementary_Tables_1__3-7.pdf]

## Supplementary Information

Supplementary Table 1a. Selected references to larger-than-average houses indicating great-than-average household wealth of the three types distinguished by<sup>12</sup>.

| Reference | Time                                                                                                                                     | Place                                             | Embodied                                                                                                           | Relational | Material                                 |
|-----------|------------------------------------------------------------------------------------------------------------------------------------------|---------------------------------------------------|--------------------------------------------------------------------------------------------------------------------|------------|------------------------------------------|
| 46        | Whenever the Domestic Mode of Production prevails                                                                                        | Wherever the Domestic Mode of Production prevails | x                                                                                                                  | x          | x                                        |
| 47        | "Wherever recorded data on wealth and household size [number of members] are present, the two indices apparently vary together" (p. 641) |                                                   |                                                                                                                    |            |                                          |
| 48        | Archaeological and ethnographic                                                                                                          | Northern temperate, sub-arctic, and arctic        | Larger-than-average houses may indicate either more members in the household, or greater wealth permitting heating |            |                                          |
| 49        | Neolithic                                                                                                                                | Levant                                            | ?                                                                                                                  | ?          | ?                                        |
| 49        | Early Dynastic                                                                                                                           | Mesopotamia                                       | x                                                                                                                  | x          | x                                        |
| 50        | various                                                                                                                                  | Anatolia                                          | x                                                                                                                  |            |                                          |
| 51        | By ~3000 BP                                                                                                                              | Northwest Coast, North America                    | x                                                                                                                  | x          | x                                        |
| 52        | ~3000 - 2500 BP                                                                                                                          | Northwest Coast, North America                    | x                                                                                                                  |            |                                          |
| 53        | Classic                                                                                                                                  | Hohokam (Casa Grande)                             | Largest compound (Big House) thought to be elite residence, such as chief's house                                  |            |                                          |
| 54        | 14th century                                                                                                                             | Montaillou, Ariège, France                        | x                                                                                                                  | x          | x (though differences relatively modest) |
| 55        | 15th century                                                                                                                             | Aztec settlements                                 |                                                                                                                    |            | x                                        |
| 56        | 17th century                                                                                                                             | Iroquois (chief's houses)                         | x                                                                                                                  | x          | x                                        |

|    |                                               |                         |   |   |   |
|----|-----------------------------------------------|-------------------------|---|---|---|
| 57 | 17th century                                  | New Amsterdam           |   |   | x |
| 58 | 18th century                                  | American colonies       |   |   | x |
| 59 | "Traditional Europe" and colonial New England |                         | x | x | x |
| 60 | 19th & 20th centuries                         | Picardy, France         | x | x | x |
| 61 | 20th century                                  | Kurdish village, Iran   | x |   | x |
| 62 | 20th century                                  | Burmese villages        |   | x | x |
| 63 | 20th century                                  | Syrian villages         | x | x | x |
| 64 | 20th century                                  | Maya village            | x |   | x |
| 65 | 20th century                                  | Peasant villages        |   |   | x |
| 66 | 20th century                                  | Maya village            |   |   | x |
| 67 | 20th century                                  | Chinese peasant village |   |   | x |
| 68 | Contemporary peasant communities              |                         | x | x | x |

---

Supplementary Table 1b. References to larger-than-average houses having no verifiable relationship with greater-than-average embodied (E), relational (R), or material (M) wealth.

| Reference     | Time         | Place                      | E | R | M                                                                      |
|---------------|--------------|----------------------------|---|---|------------------------------------------------------------------------|
| <sup>69</sup> | Late Classic | Hohokam<br>(Pueblo Grande) |   |   | Status-related artifacts not associated with larger rooms in compounds |
| <sup>70</sup> | 18th century | Hawaii                     |   |   | x                                                                      |

Supplementary Table 2. Data used in this study, sorted by hemisphere and ascending date, with metadata. (Downloadable spreadsheet).

Supplementary Table 3. Cross-tabulation of political scale by hemisphere among the sites and societies in our sample. Total observations in table: 63,  $\chi^2 = 7.594$ , d.f. = 4,  $p = 0.108$ .

| Political Scale | Factors               | New World | Old World |
|-----------------|-----------------------|-----------|-----------|
| Family          | N                     | 0         | 1         |
|                 | Expected N            | 0.603     | 0.397     |
|                 | $\chi^2$ contribution | 0.603     | 0.917     |
| Local           | N                     | 5         | 7         |
|                 | Expected N            | 7.238     | 4.762     |
|                 | $\chi^2$ contribution | 0.731     | 1.141     |
| Big Man         | N                     | 10        | 1         |
|                 | Expected N            | 6.635     | 4.365     |
|                 | $\chi^2$ contribution | 1.707     | 2.594     |
| Regional        | N                     | 13        | 9         |
|                 | Expected N            | 13.270    | 8.730     |
|                 | $\chi^2$ contribution | 0.005     | 0.008     |
| State           | N                     | 10        | 7         |
|                 | Expected N            | 10.254    | 6.746     |
|                 | $\chi^2$ contribution | 0.006     | 0.010     |

Supplementary Table 4. Cross-tabulation of political regime strategy by hemisphere among the states in sample. Total observations in table: 18,  $\chi^2 = 5.10$ , d.f. = 2,  $p = 0.078$ .

| Political Regime | Factors               | New World | Old World |
|------------------|-----------------------|-----------|-----------|
| Collective       | N                     | 1         | 4         |
|                  | Expected N            | 3.056     | 1.944     |
|                  | $\chi^2$ contribution | 1.383     | 2.173     |
| Intermediate     | N                     | 8         | 2         |
|                  | Expected N            | 6.111     | 3.889     |
|                  | $\chi^2$ contribution | 0.584     | 0.917     |
| Autocratic       | N                     | 2         | 1         |
|                  | Expected N            | 1.833     | 1.167     |
|                  | $\chi^2$ contribution | 0.015     | 0.024     |

Supplementary Table 5. Relationship between measures of demographic scale and Gini coefficients by hemisphere.

| Measure of Demographic Scale                                                             | Factors           | Gini Coefficients |           |
|------------------------------------------------------------------------------------------|-------------------|-------------------|-----------|
|                                                                                          |                   | New World         | Old World |
| log <sub>10</sub> (Site Population in Households)                                        | Slope estimate    | 0.050             | 0.098     |
|                                                                                          | r <sup>2</sup>    | 0.131             | 0.293     |
|                                                                                          | F                 | 2.56              | 7.05      |
|                                                                                          | F <sub>(df)</sub> | 1,17              | 1,17      |
|                                                                                          | P > F             | 0.128             | 0.017     |
| log <sub>10</sub> (Regional Population in Households)                                    | Slope estimate    | 0.045             | 0.060     |
|                                                                                          | r <sup>2</sup>    | 0.130             | 0.488     |
|                                                                                          | F                 | 4.62              | 9.539     |
|                                                                                          | F <sub>(df)</sub> | 1,31              | 1,10      |
|                                                                                          | P > F             | 0.040             | 0.011     |
| log <sub>10</sub> (Regional Population Density) = Log <sub>10</sub> (Households / sq km) | Slope estimate    | 0.009             | 0.217     |
|                                                                                          | F                 | 0.148             | 9.857     |
|                                                                                          | F <sub>(df)</sub> | 1,27              | 1,9       |
|                                                                                          | P > F             | 0.702             | 0.012     |

Supplementary Table 6. Comparison of Ginis Calculated on House Sizes with those Calculated on Other Bases, in approximately matched contexts.

| Society                              | Gini Coefficients                                      |                                                                  | Basis for Gini coefficients in 5                                                                                                         |
|--------------------------------------|--------------------------------------------------------|------------------------------------------------------------------|------------------------------------------------------------------------------------------------------------------------------------------|
|                                      | This paper (house-size distributions)                  | 5                                                                |                                                                                                                                          |
| Ju'hoansi !Kung (foragers, Botswana) | 0.17                                                   | 0.16                                                             | 31 items of wealth distributed among 12 couples ("preferred measure" accounting for substitution and complementarity among wealth types) |
| Hohokam                              | 0.25 (All Hohokam compounds, Colonial period, ~AD 850) | 0.56 (Bellevue site, ~AD 900)                                    | Burial goods on individuals, randomly reassigned to form male-female couples (average)                                                   |
| Columbia Plateau                     | 0.20 (Bridge River 2, ~AD 500)                         | 0.62 (22 burial sites, mostly first and early 2nd-millennium AD) | Burial goods on individuals, randomly reassigned to form male-female couples (average)                                                   |
| Roman Republic and Empire            | Herculaneum, 0.52; Pompeii, 0.54, both at AD 79        | 0.85                                                             | Landholdings in 12 contexts from 116 BC - AD 525 after taking into account those with no landholdings                                    |

Supplementary Table 7. Data for Gini Calculation, Tenochtitlan (data for the single imperial suite are in text).

| Site | No. | Social category  | Houselot area (sq m) | Statistics, Social Category |       |
|------|-----|------------------|----------------------|-----------------------------|-------|
|      |     |                  |                      | Mean                        | s     |
| C 5  | 1   | Elite            | 1,148                |                             |       |
| C 7  | 6   | Elite            | 1,466                |                             |       |
| F 4  | B   | Elite            | 1,216                |                             |       |
|      |     |                  |                      | 1,277                       | 167.5 |
| E 5  | 1   | Wealthy commoner | 817                  |                             |       |
| G 5  | 1.2 | Wealthy commoner | 800                  |                             |       |
| H 11 | 3   | Wealthy commoner | 817                  |                             |       |
|      |     |                  |                      | 811                         | 9.8   |
| C 7  | 5   | Commoner         | 567                  |                             |       |
| F 9  | 2   | Commoner         | 522                  |                             |       |
| F 9  | 3   | Commoner         | 522                  |                             |       |
| F 9  | 4   | Commoner         | 522                  |                             |       |
| F 9  | 5   | Commoner         | 522                  |                             |       |
| H 11 | 1   | Commoner         | 475                  |                             |       |
| C 7  | 1   | Commoner         | 462                  |                             |       |
| C 8  | 1   | Commoner         | 420                  |                             |       |
| G 10 | 2   | Commoner         | 408                  |                             |       |
| C 7  | 4   | Commoner         | 393                  |                             |       |
| E 5  | A   | Commoner         | 390                  |                             |       |
| D 5  | 1   | Commoner         | 360                  |                             |       |
| H 5  | 2   | Commoner         | 348                  |                             |       |
| D 8  | 5   | Commoner         | 336                  |                             |       |
| C 7  | 3   | Commoner         | 330                  |                             |       |
| C 7  | 2   | Commoner         | 325                  |                             |       |
| D 7  | 1   | Commoner         | 320                  |                             |       |
| H 5  | 1   | Commoner         | 318                  |                             |       |
| F 9  | 1   | Commoner         | 307                  |                             |       |
| H 11 | 2   | Commoner         | 306                  |                             |       |
| D 8  | 11  | Commoner         | 305                  |                             |       |
| G 12 | 1   | Commoner         | 281                  |                             |       |
| E 5  | 2   | Commoner         | 260                  |                             |       |
| G 5  | 5   | Commoner         | 235                  |                             |       |
| H 7  | 7   | Commoner         | 234                  |                             |       |
| E 4  | C   | Commoner         | 224                  |                             |       |
| I 8  | 2   | Commoner         | 224                  |                             |       |
| H 7  | 1   | Commoner         | 210                  |                             |       |
| D 8  | 3   | Commoner         | 205                  |                             |       |
| G 12 | 2   | Commoner         | 180                  |                             |       |
| D 3  | A   | Commoner         | 170                  |                             |       |
| D 6  | 1   | Commoner         | 167                  |                             |       |
| G 5  | 2   | Commoner         | 167                  |                             |       |
| E 8  | 4   | Commoner         | 165                  |                             |       |
| C 6  | 5   | Commoner         | 162                  |                             |       |

|      |     |          |     |
|------|-----|----------|-----|
| D 9  | 2   | Commoner | 162 |
| C 6  | 2   | Commoner | 160 |
| F 9  | 8   | Commoner | 154 |
| D 6  | 1.1 | Commoner | 152 |
| E 4  | B   | Commoner | 144 |
| I 8  | 1   | Commoner | 140 |
| G 9  | 8   | Commoner | 136 |
| G 12 | 3   | Commoner | 134 |
| G 5  | 7   | Commoner | 126 |
| G 5  | 8   | Commoner | 118 |
| C 6  | 3   | Commoner | 111 |
| H 10 | 1   | Commoner | 104 |
| F 4  | A   | Commoner | 102 |
| H 10 | 2   | Commoner | 80  |
| G 5  | 3   | Commoner | 50  |
| G 9  | 9   | Commoner | 50  |
| F 4  | C   | Commoner | 44  |
| E 4  | A   | Commoner | 36  |

---

252

143.4

### Supplementary References

46. Coupland, G. & Banning, E. B. Introduction: The archaeology of big houses. *People Who Lived in Big Houses: Archaeological Perspectives on Large Domestic Structures* 1–10 (1996).
47. Netting, R. M. Some Home Truths on Household Size and Wealth. *Am. Behav. Sci.* **25**, 641–662 (1982).
48. Hayden, B., Reinhardt, G., MacDonald, R., Holmberg, D. & Crellin, D. Space per capita and the optimal size of housepits. *Monographs in World Archaeology* 151–164 (1996).
49. Banning, E. B. Houses, compounds and mansions in the prehistoric Near East. *People who lived in big houses: archaeological perspectives on large domestic structures* 165–185 (1996).
50. Cutting, M. More than One Way to Study a Building: Approaches to Prehistoric Household and Settlement Space. *Oxford Journal of Archaeology* **25**, 225–246 (2006).
51. Ames, K. M. Life in the big house: household labor and dwelling size on the Northwest Coast. *People who lived in big houses: archaeological perspectives on large domestic*



- structures* 131–150 (1996).
52. Coupland, G. The evolution of multi-family households on the Northwest coast of North America. *People who lived in big houses: Archaeological perspectives on large domestic structures* 121–130 (1996).
  53. Wilcox, D. R. & Shenk, L. O. *The Architecture of the Casa Grande and Its Interpretation*. **115**, (Arizona State Museum, 1977).
  54. Ladurie, E. L. R. *Montaillou, the promised land of error*. (Vintage, 1979).
  55. Olson, J. M. & Smith, M. E. Material Expressions of Wealth and Social Class at Aztec-period Sites in Morelos, Mexico. *Ancient Mesoamerica* **27**, 133–147 (2016).
  56. Thwaites, R. G. 1896--1901 The Jesuit Relations and Allied Documents. 73 vols. *Burroughs Brothers, Cleveland* (1959).
  57. Rothschild, N. A. Keeping Up with the Stuyvesants: House Size and Status in Seventeenth-Century New Amsterdam. in *Configurations of Power: Holistic Anthropology in Theory and Practice* (eds. Henderson, J. S. & Netherly, P.) 228–243 (Cornell University Press, 1993).
  58. Jones, A. H. *Wealth of a nation to be: The American colonies on the eve of the Revolution*. (Columbia University Press, 1980).
  59. Shorter, E. *The making of the modern family*. (Basic Books, 1975).
  60. Morel, A. Power and ideology in the village community of Picardy: past and present. *Rural Society in France*. *John Hopkins University Press, Baltimore* (1977).
  61. Kramer, C. An archaeological view of a contemporary Kurdish village: domestic architecture, household size, and wealth. in *Ethnoarchaeology: Implications of Ethnography for Archaeology* (ed. Kramer, C.) 139–163 (Columbia University Press, 1979).
  62. Nash, M. *The golden road to modernity: village life in contemporary Burma*. (New York, 1965).
  63. Kamp, K. From Village to Tell: Household Ethnoarchaeology in Syria. *Near Eastern Archaeology* **63**, 84–93 (2000).

64. Wilk, R. R. Little house in the jungle: The causes of variation in house size among modern Kekchi Maya. *Journal of Anthropological Archaeology* **2**, 99–116 (1983).
65. Castro, A. P., Hakansson, N. T. & Brokensha, D. Indicators of rural inequality. *World Dev.* **9**, 401–427 (1981).
66. Tax, S. Penny capitalism: a Guatemalan Indian community. *Washington, DC: Smithsonian Institute of Social Anthropology* (1953).
67. Yang, M. C. *A Chinese Village: Taitou, Shantung Province*. (Columbia University, Department of Anthropology, 1945).
68. Blanton, R. E. *Houses and Households: A Comparative Study*. (Springer Science & Business Media, 1994).
69. Foster, M. S., Mitchell, D. R., Dale, B. C. & Robinson, C. K. Late Classic Period Hohokam Households: A Preliminary View from Pueblo Grande. *People Who Lived in Big Houses: Archaeological Perspectives on Large Domestic Structures* 27–45 (1996).
70. Earle, T. Wealth Inequality and the Pristine Hawaiian State: A Political Economy Approach. *Origini--Preistoria e protostoria delle civiltà antiche XXXVIII*, 195–210 (2017).
71. Flannery, K. V. & Marcus, J. *Excavations at San José Mogote 1: The household archaeology*. **1**, (University of Michigan Museum, 2005).
72. Turner, B. L. & Sabloff, J. A. Classic Period collapse of the Central Maya Lowlands: Insights about human–environment relationships for sustainability. *Proceedings of the National Academy of Sciences* **109**, 13908–13914 (2012).
73. Bocinsky, R. K., Rush, J., Kintigh, K. W. & Kohler, T. A. Exploration and exploitation in the macrohistory of the pre-Hispanic Pueblo Southwest. *Sci Adv* **2**, e1501532 (2016).
74. Pauketat, T. R. & Lopinot, N. H. Cahokian population dynamics. *Cahokia: Domination and Ideology in the Mississippian World* 103–123 (1997).
75. Milner, G. R. Mississippian Period Population Density in a Segment of the Central Mississippi River Valley. *Am. Antiq.* **51**, 227–238 (1986).

76. Milner, G. R. *The Cahokia Chiefdom: The Archaeology of a Mississippian Society*. (University Press of Florida, 2006).
77. Lawrence, D., Philip, G., Hunt, H., Snape-Kennedy, L. & Wilkinson, T. J. Long Term Population, City Size and Climate Trends in the Fertile Crescent: A First Approximation. *PLoS One* **11**, e0152563 (2016).
78. Hodder, I. *Çatalhöyük excavations: the 2000-2008 seasons*. (British Institute at Ankara, 2014).
79. Bogaard, A. *et al.* The Bandkeramik settlement of Vaihingen an der Enz, Kreis Ludwigsburg (Baden-Württemberg): an integrated perspective on land use, economy and diet. *Germania : Anzeiger der Römisch-Germanischen Kommission des Deutschen Archäologischen Instituts* **94**, 1–60 (2017).
80. Neimenggu Wenwu Kaogu Yanjiusuo. Keshiketeng Qi Nantaizi Yizhi. in *Neimenggu Wenwu Kaogu Wenji* (ed. Wei, J.) **2**, 53–78 (Zhongguo Dabaike Quanshu Chubanshe, 1997).
81. Shelach, G. Economic adaptation, community structure, and sharing strategies of households at early sedentary communities in northeast China. *Journal of Anthropological Archaeology* **25**, 318–345 (2006).
82. Peterson, C. E. & Shelach, G. Jiangzhai: Social and economic organization of a Middle Neolithic Chinese village. *Journal of Anthropological Archaeology* **31**, 265–301 (2012).
83. Neimenggu Wenwu Kaogu Yanjiusuo. *Baiyinchanghan: Xinshiqi Shidai Yizhi Fajue Baogao*. (Kexue Chubanshe, 2004).
84. Ma, X. *Emergent Social Complexity in the Yangshao Culture: Analyses of Settlement Patterns and Faunal Remains from Lingbao, Western Henan, China (c. 4900–3000 BC)*. **1453**, (Archaeopress, 2005).
85. Gansu Sheng Wenwu Kaogu Yanjiusuo. *Gansu Dadiwan: Xinshiqi Yizhi Fajue Baogao*. **1 & 2**, (Wenwu Chubanshe, 2006).

86. Yellen, J. E. *Archaeological approaches to the present: models for reconstructing the past*. **1**, (Academic Press, 1977).
87. Shandong Sheng Wenwu Kaogu Yanjiusuo, and Zaozhuang Shi Wenwuju. *Zaozhuang Jianxin—Shishixi Shidai Yizhi Fajue Baogao*. (Kexue Chubanshe, 1996).
88. Zhongguo Shehui Kexue Kaogu Yanjiusuo. *Mengcheng Yuchisi—Wanbei Xinshiqi Shidai Juluo Yicun de Fajue yu Yanjiu*. (Kexue Chubanshe, 2001).
89. Kurz, S. Zur Genese und Entwicklung der Heuneburg in der späten Hallstattzeit. in *'Fürstensitze' und Zentralorte der frühen Kelten : Abschlusskolloquium des DFG-Schwerpunktprogramms 1171 in Stuttgart, 12.-15. Oktober 2009. Teil II* (ed. Krauss, D.) 239–256 (Konrad Theiss, 2010).
90. Shandong Daxue Lishixi Kaogu Zhuanye Jiaoyanshi. *Sishui Yinjiacheng*. (Wenwu Chubanshe, 1990).
